# Supplementary material
Source: publisher site journal article supplement (https://www.dovepress.com/article/405903)
Supplement: Supplementary file 1 [file get_supplementary_file.php]

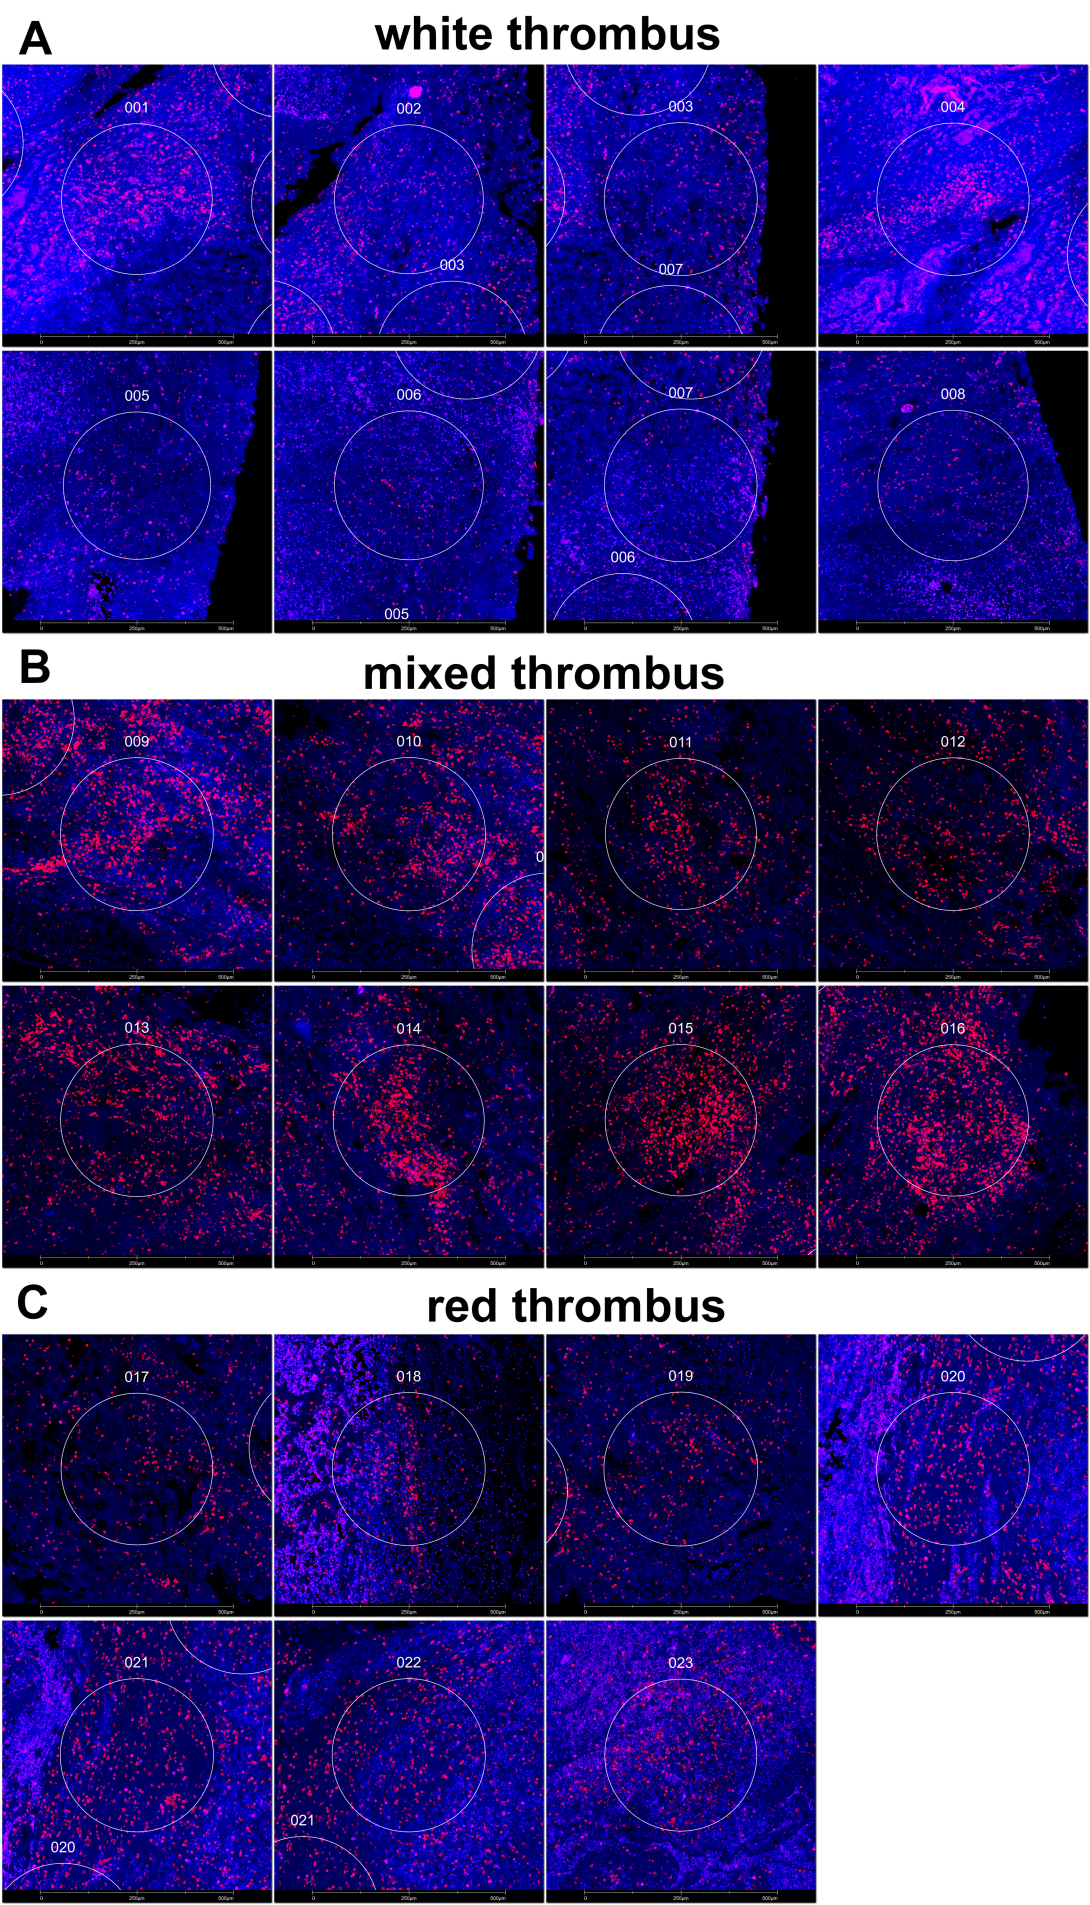


Supplementary Figure 1. The detailed regions of interest (ROI) in white (A), mixed (B) and red thrombus (C).


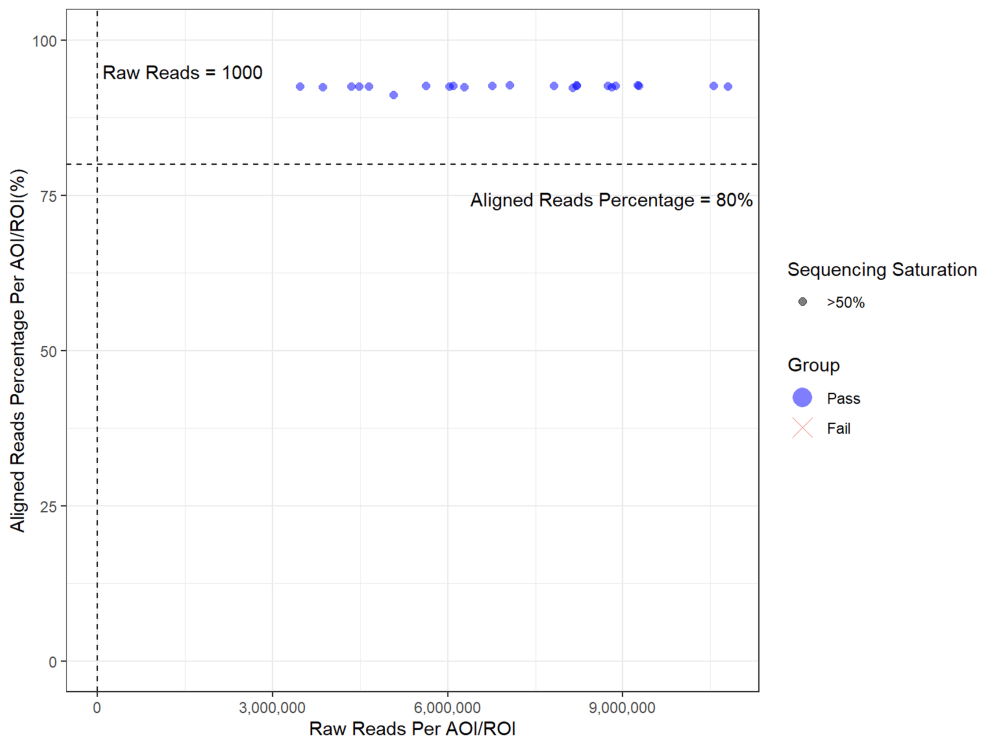


Supplementary Figure 2. Technical signal quality control is a sequencing quality evaluation of each AOI/ROI with three metrics: Raw Reads, Aligned Reads Percentage, and Sequencing Saturation. Raw Reads: all Reads sequences of the AOI/ROI at the time of sequencing. Aligned Reads Percentage: the percentage of Reads sequences in AOI/ROI that are compared to template sequences. Sequencing Saturation: Sequencing Reads of an AOI/ROI can be sequenced once or multiple times, Sequencing Saturation is the percentage of Reads that are detected at least 2 times in Raw Reads, it is recommended to exceed 50%.


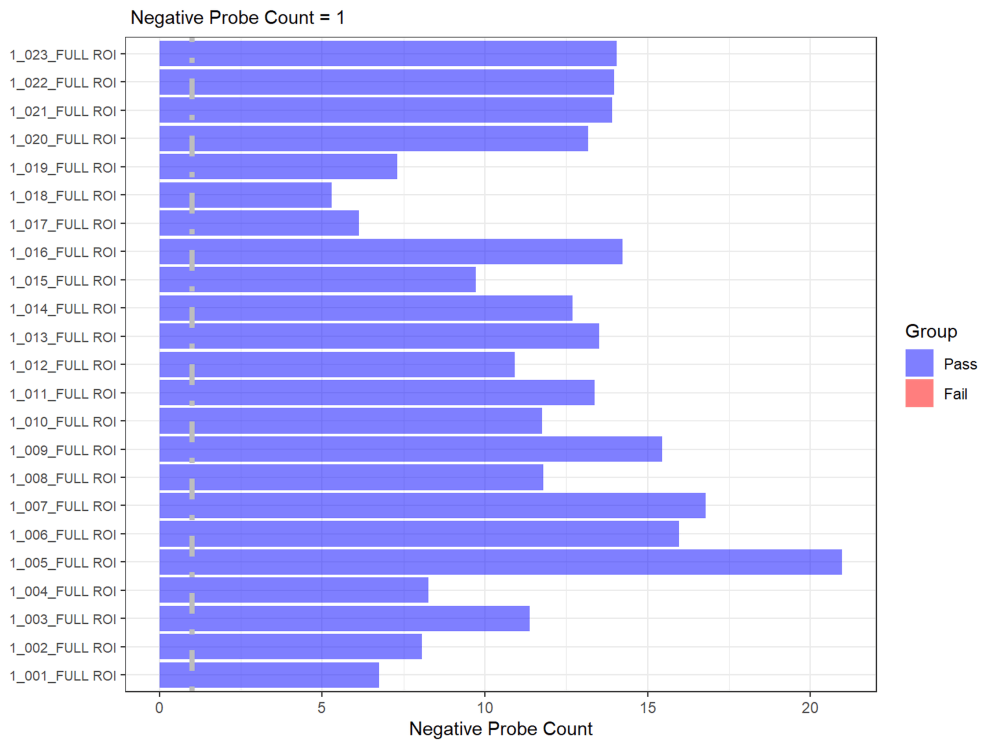


Supplementary Figure 3. Technical background quality control is a running control set by GeoMx DSP and is divided into two metrics: No Template Control Count (NTC Count) and Negative Probe Count. NTC Count is a negative control experiment set during each WTA experiment, which does not contain template to detect template contamination during library construction. Negative Probe Count is the Count of negative probes in each AOI/ROI, which is used to measure the technical noise level of this WTA experiment. Low technical noise requires consideration of whether the AOI/ROI area is too small, whether the library build is successful, and whether the sequencing depth is too low. Based on the empirical value of the negative probe measurement, a technical noise of 5 or more is required for each WTA experiment.


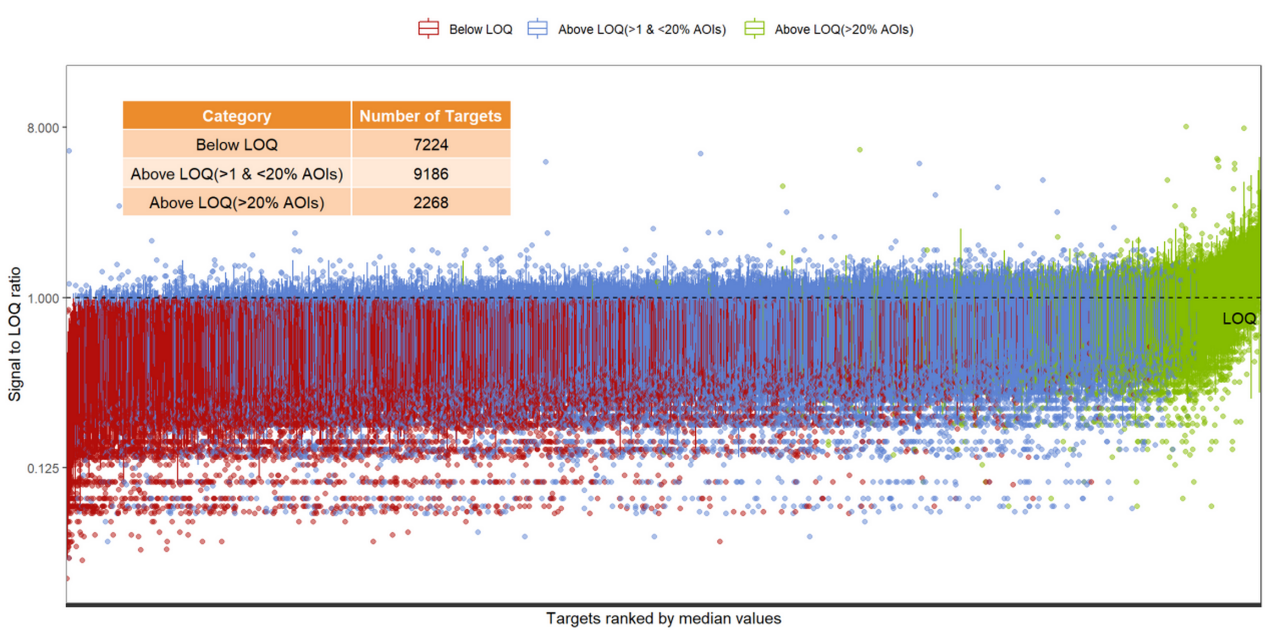


Supplementary Figure 4. The distribution of the ratio of Target signal compared to LOQ in this WTA experiment, and the y-axis has been log2-transformed.


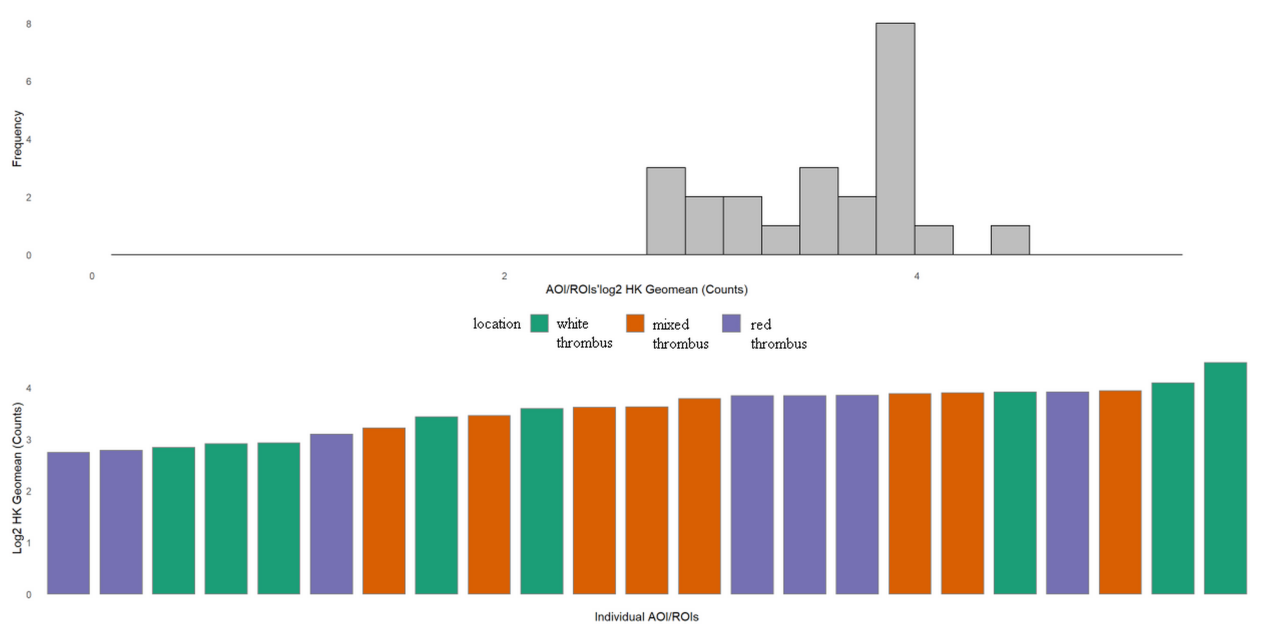


Supplementary Figure 5. The expression distribution of HouseKeeping Gene (HK) is shown below, and the geometric mean of HouseKeeping Gene was calculated logarithmically (log2) in the data. Abnormally low/high values in different groupings are required to be unusable. There were no outliers in all three samples.


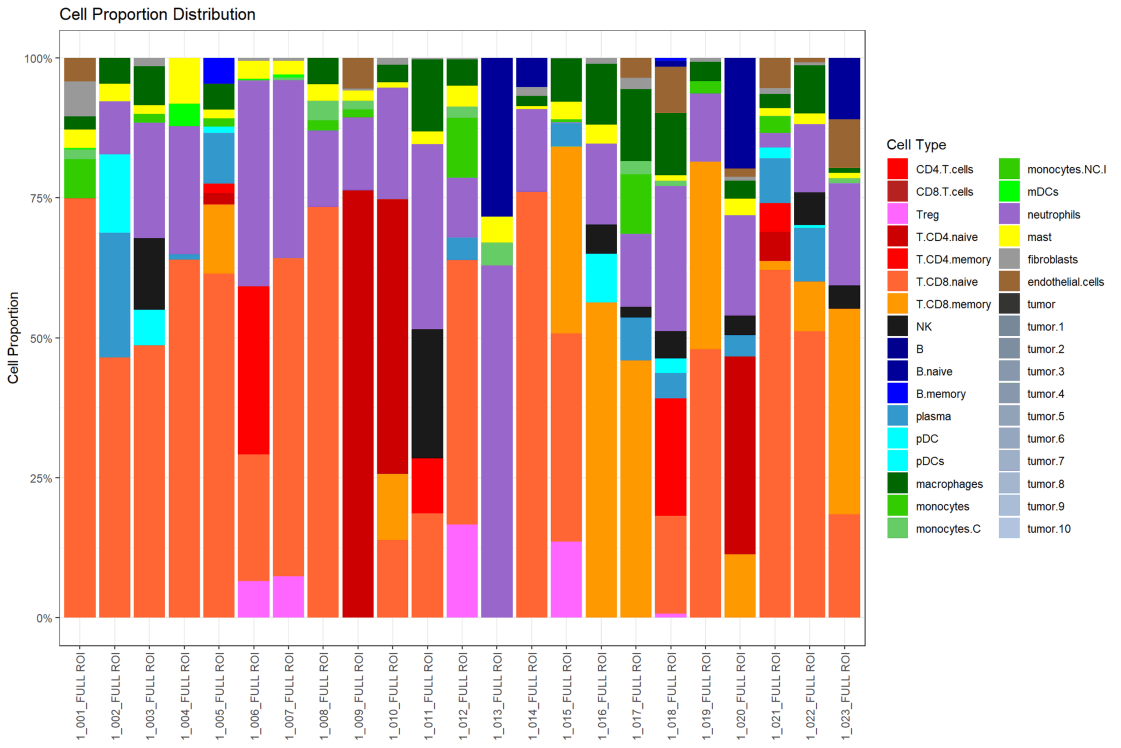


Supplementary Figure 6. The percentage of immune/inflammation cells in white, mixed and red thrombus are different.


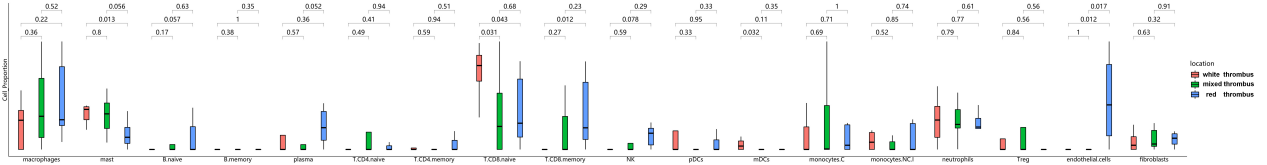


Supplementary Figure 7. The detailed statistical difference of percentage of immune/inflammation cells in white, mixed and red thrombus.


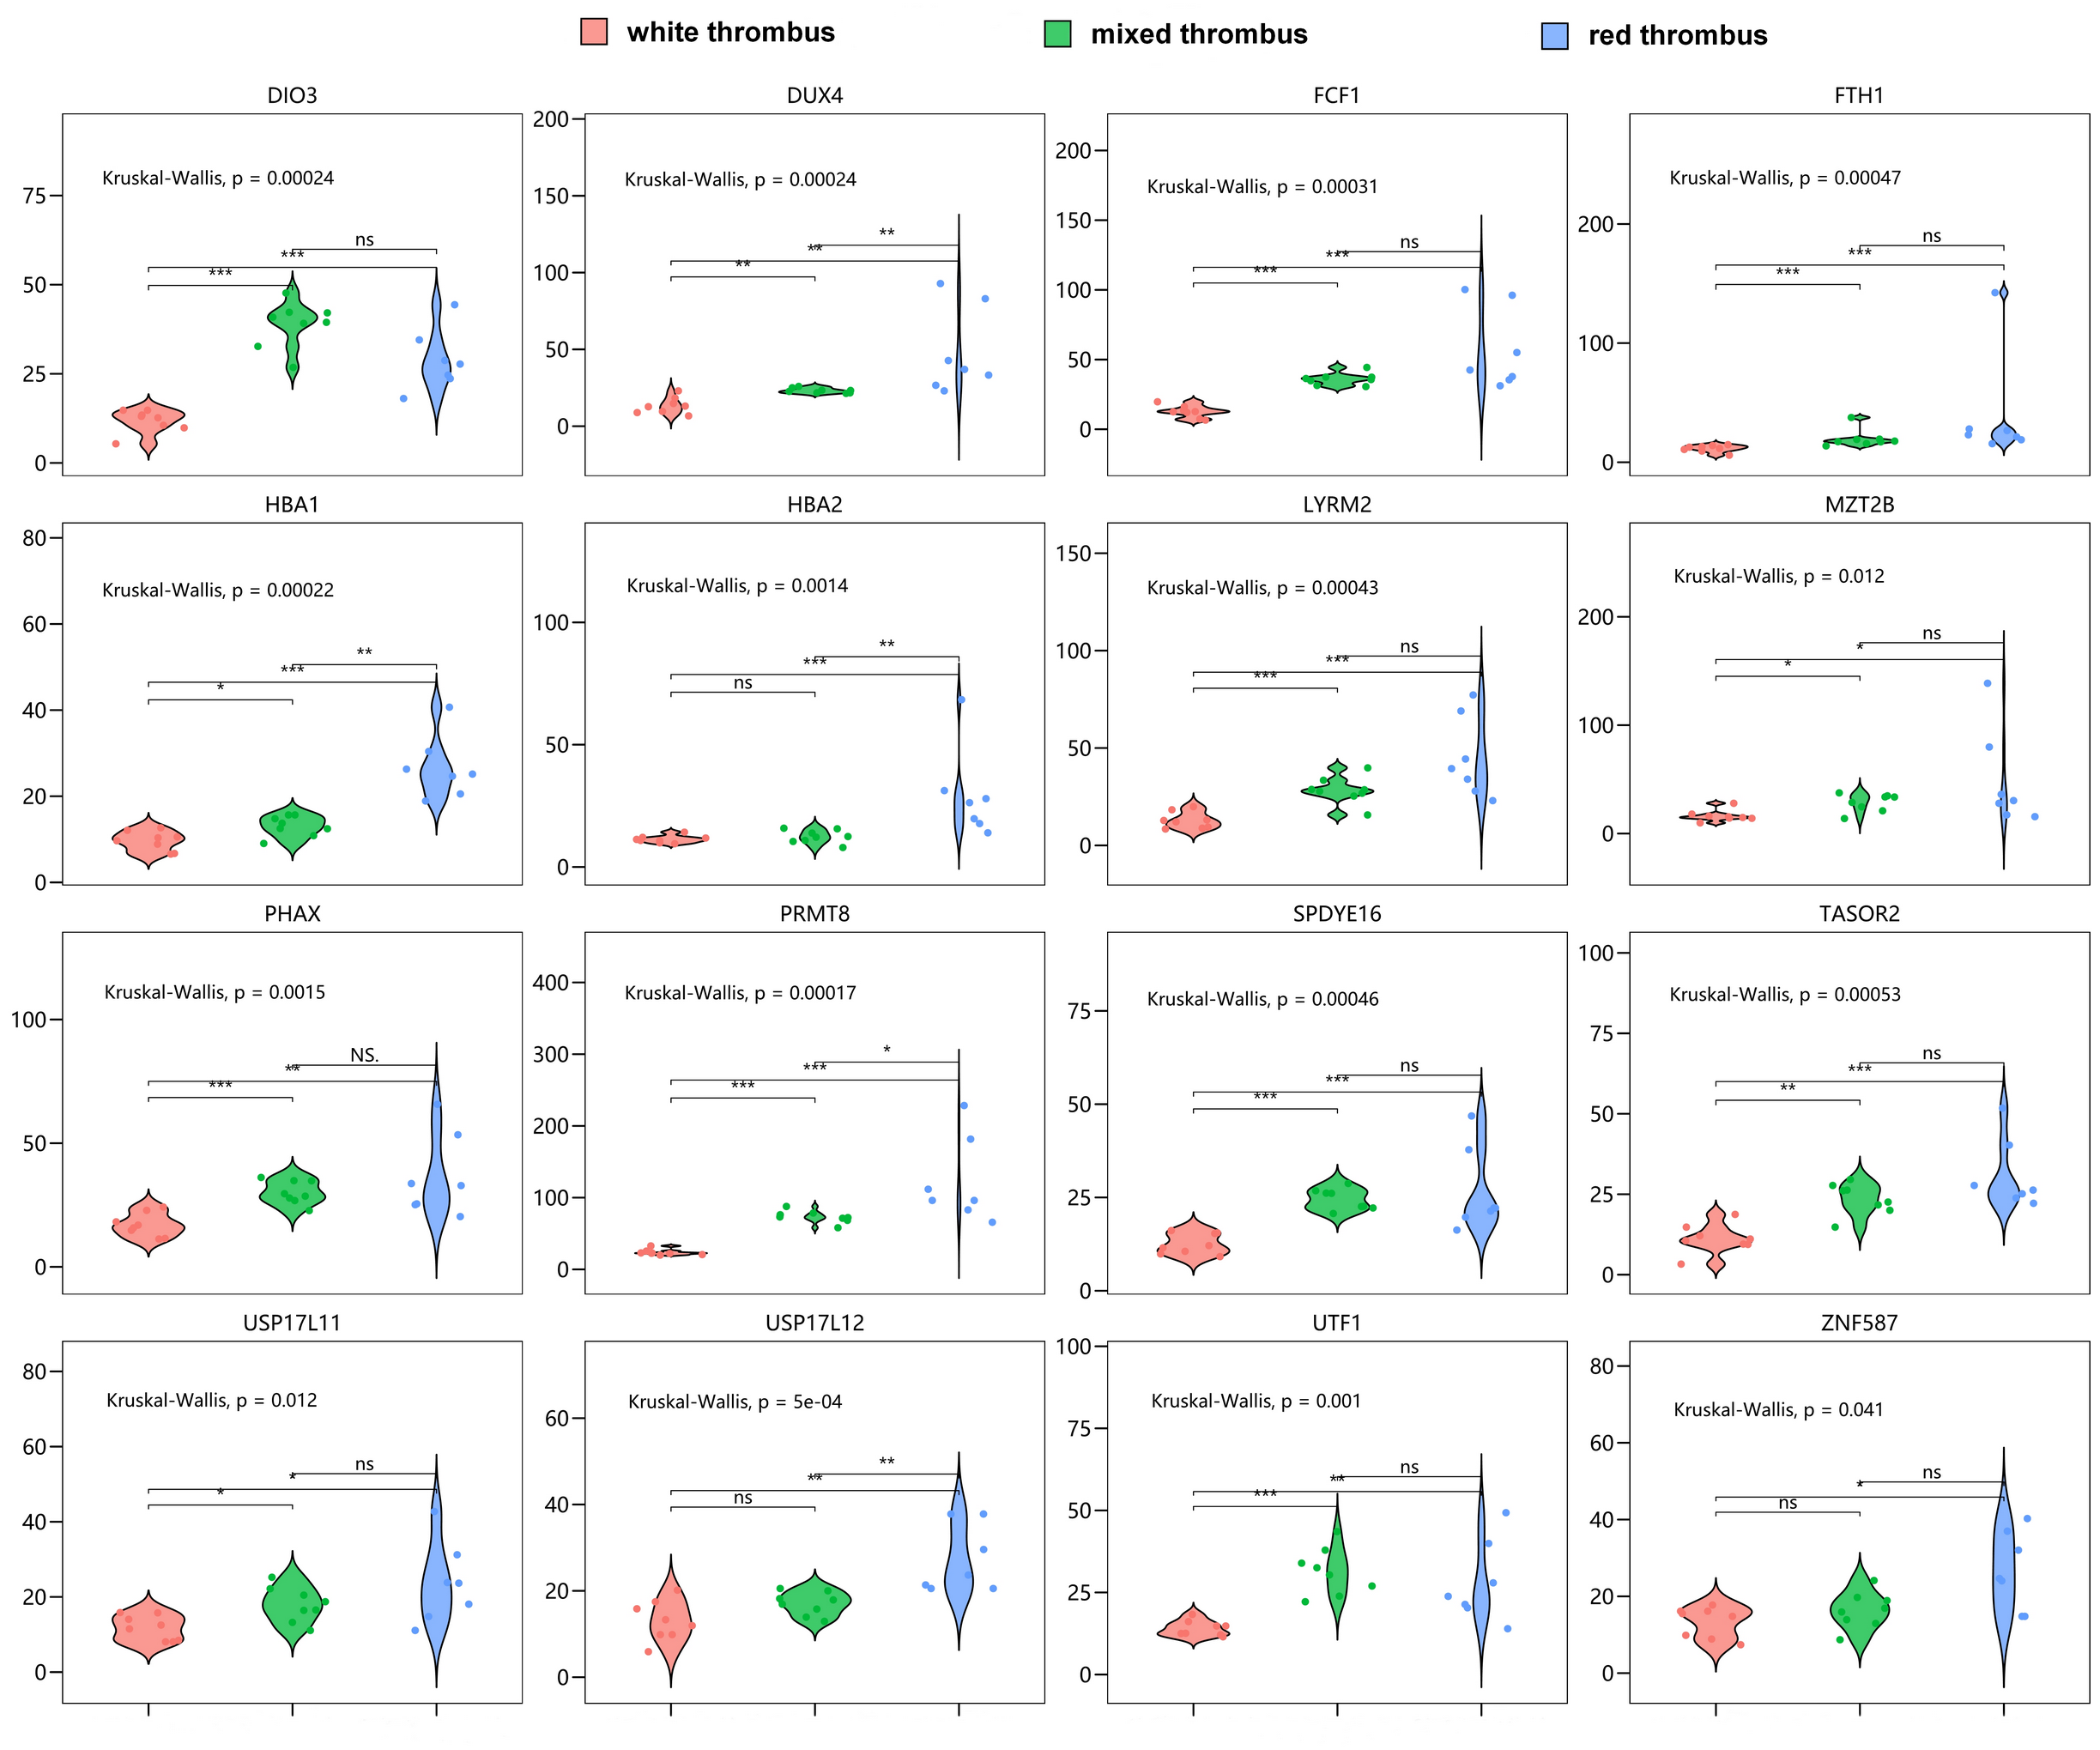


Supplementary Figure 8. Whole genome sequencing revealed 16 genes differentially expressed using Kruskal-wallis test. *, p<0.05; **, p<0.01; ***, p<0.001; ns, not significant.


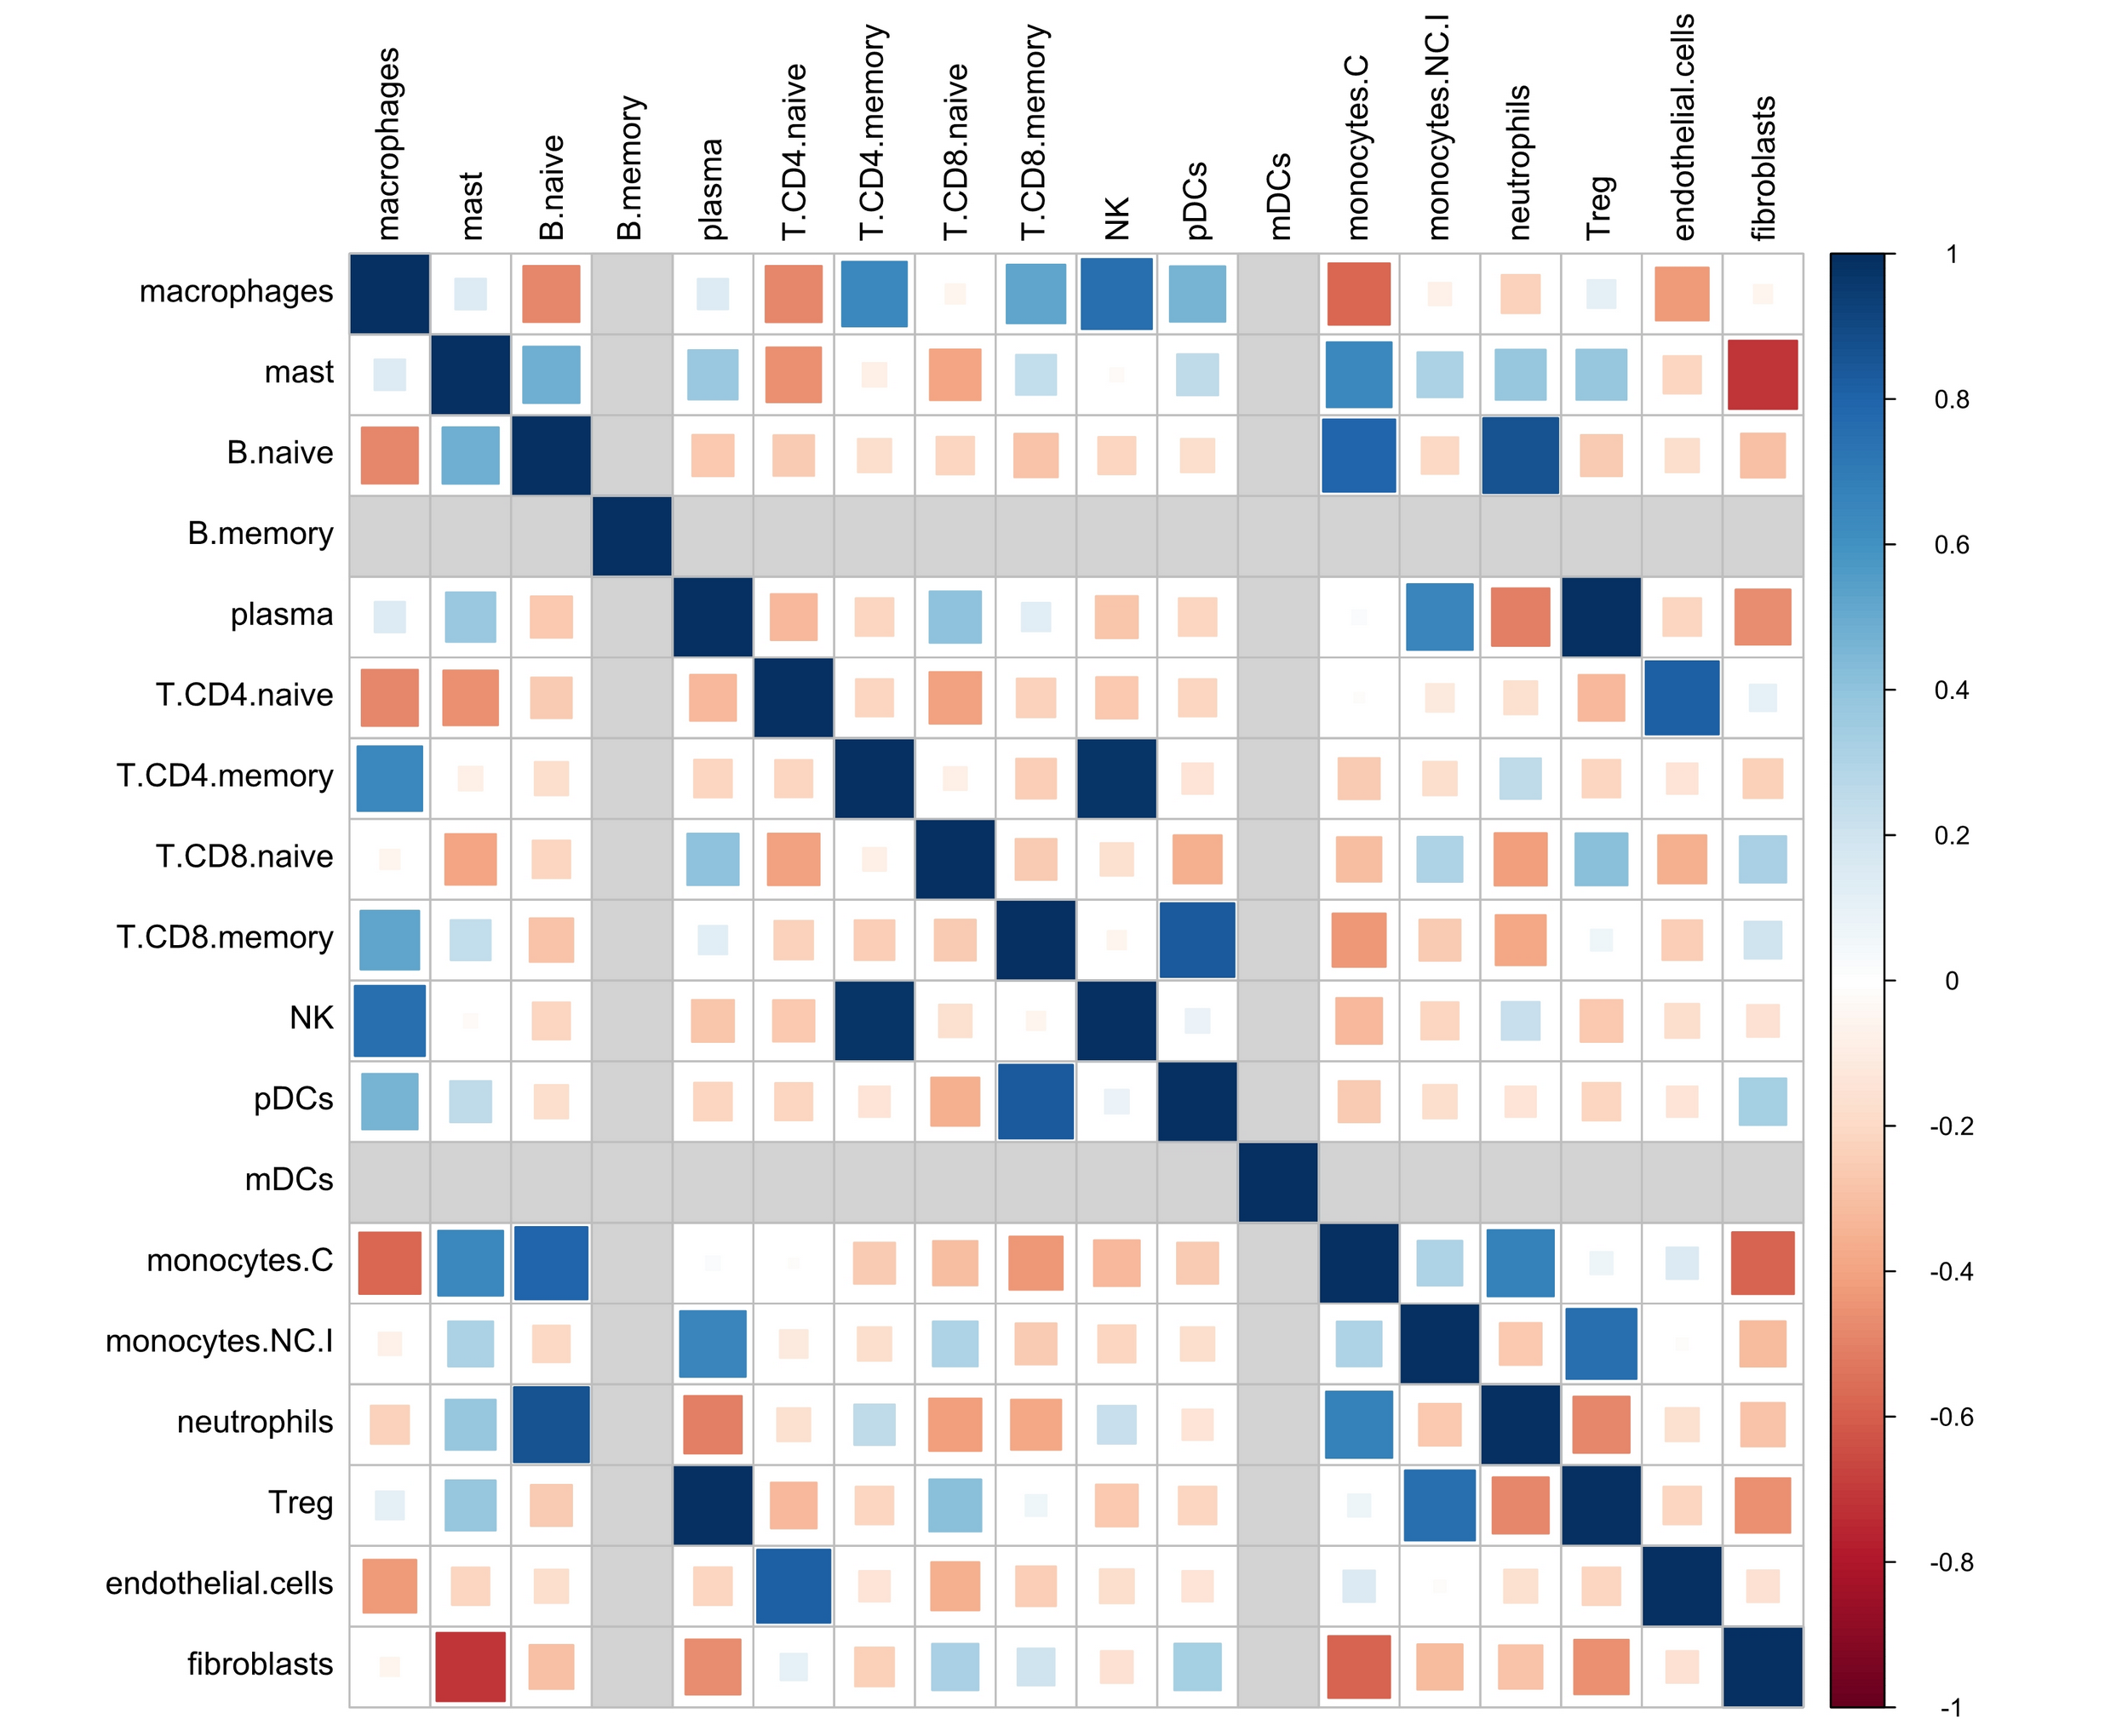


Supplementary Figure 9. Correlation matrix plot of the abundance of immune/inflammation cell subsets revealed a diminished positive correlation in mixed thrombosis.


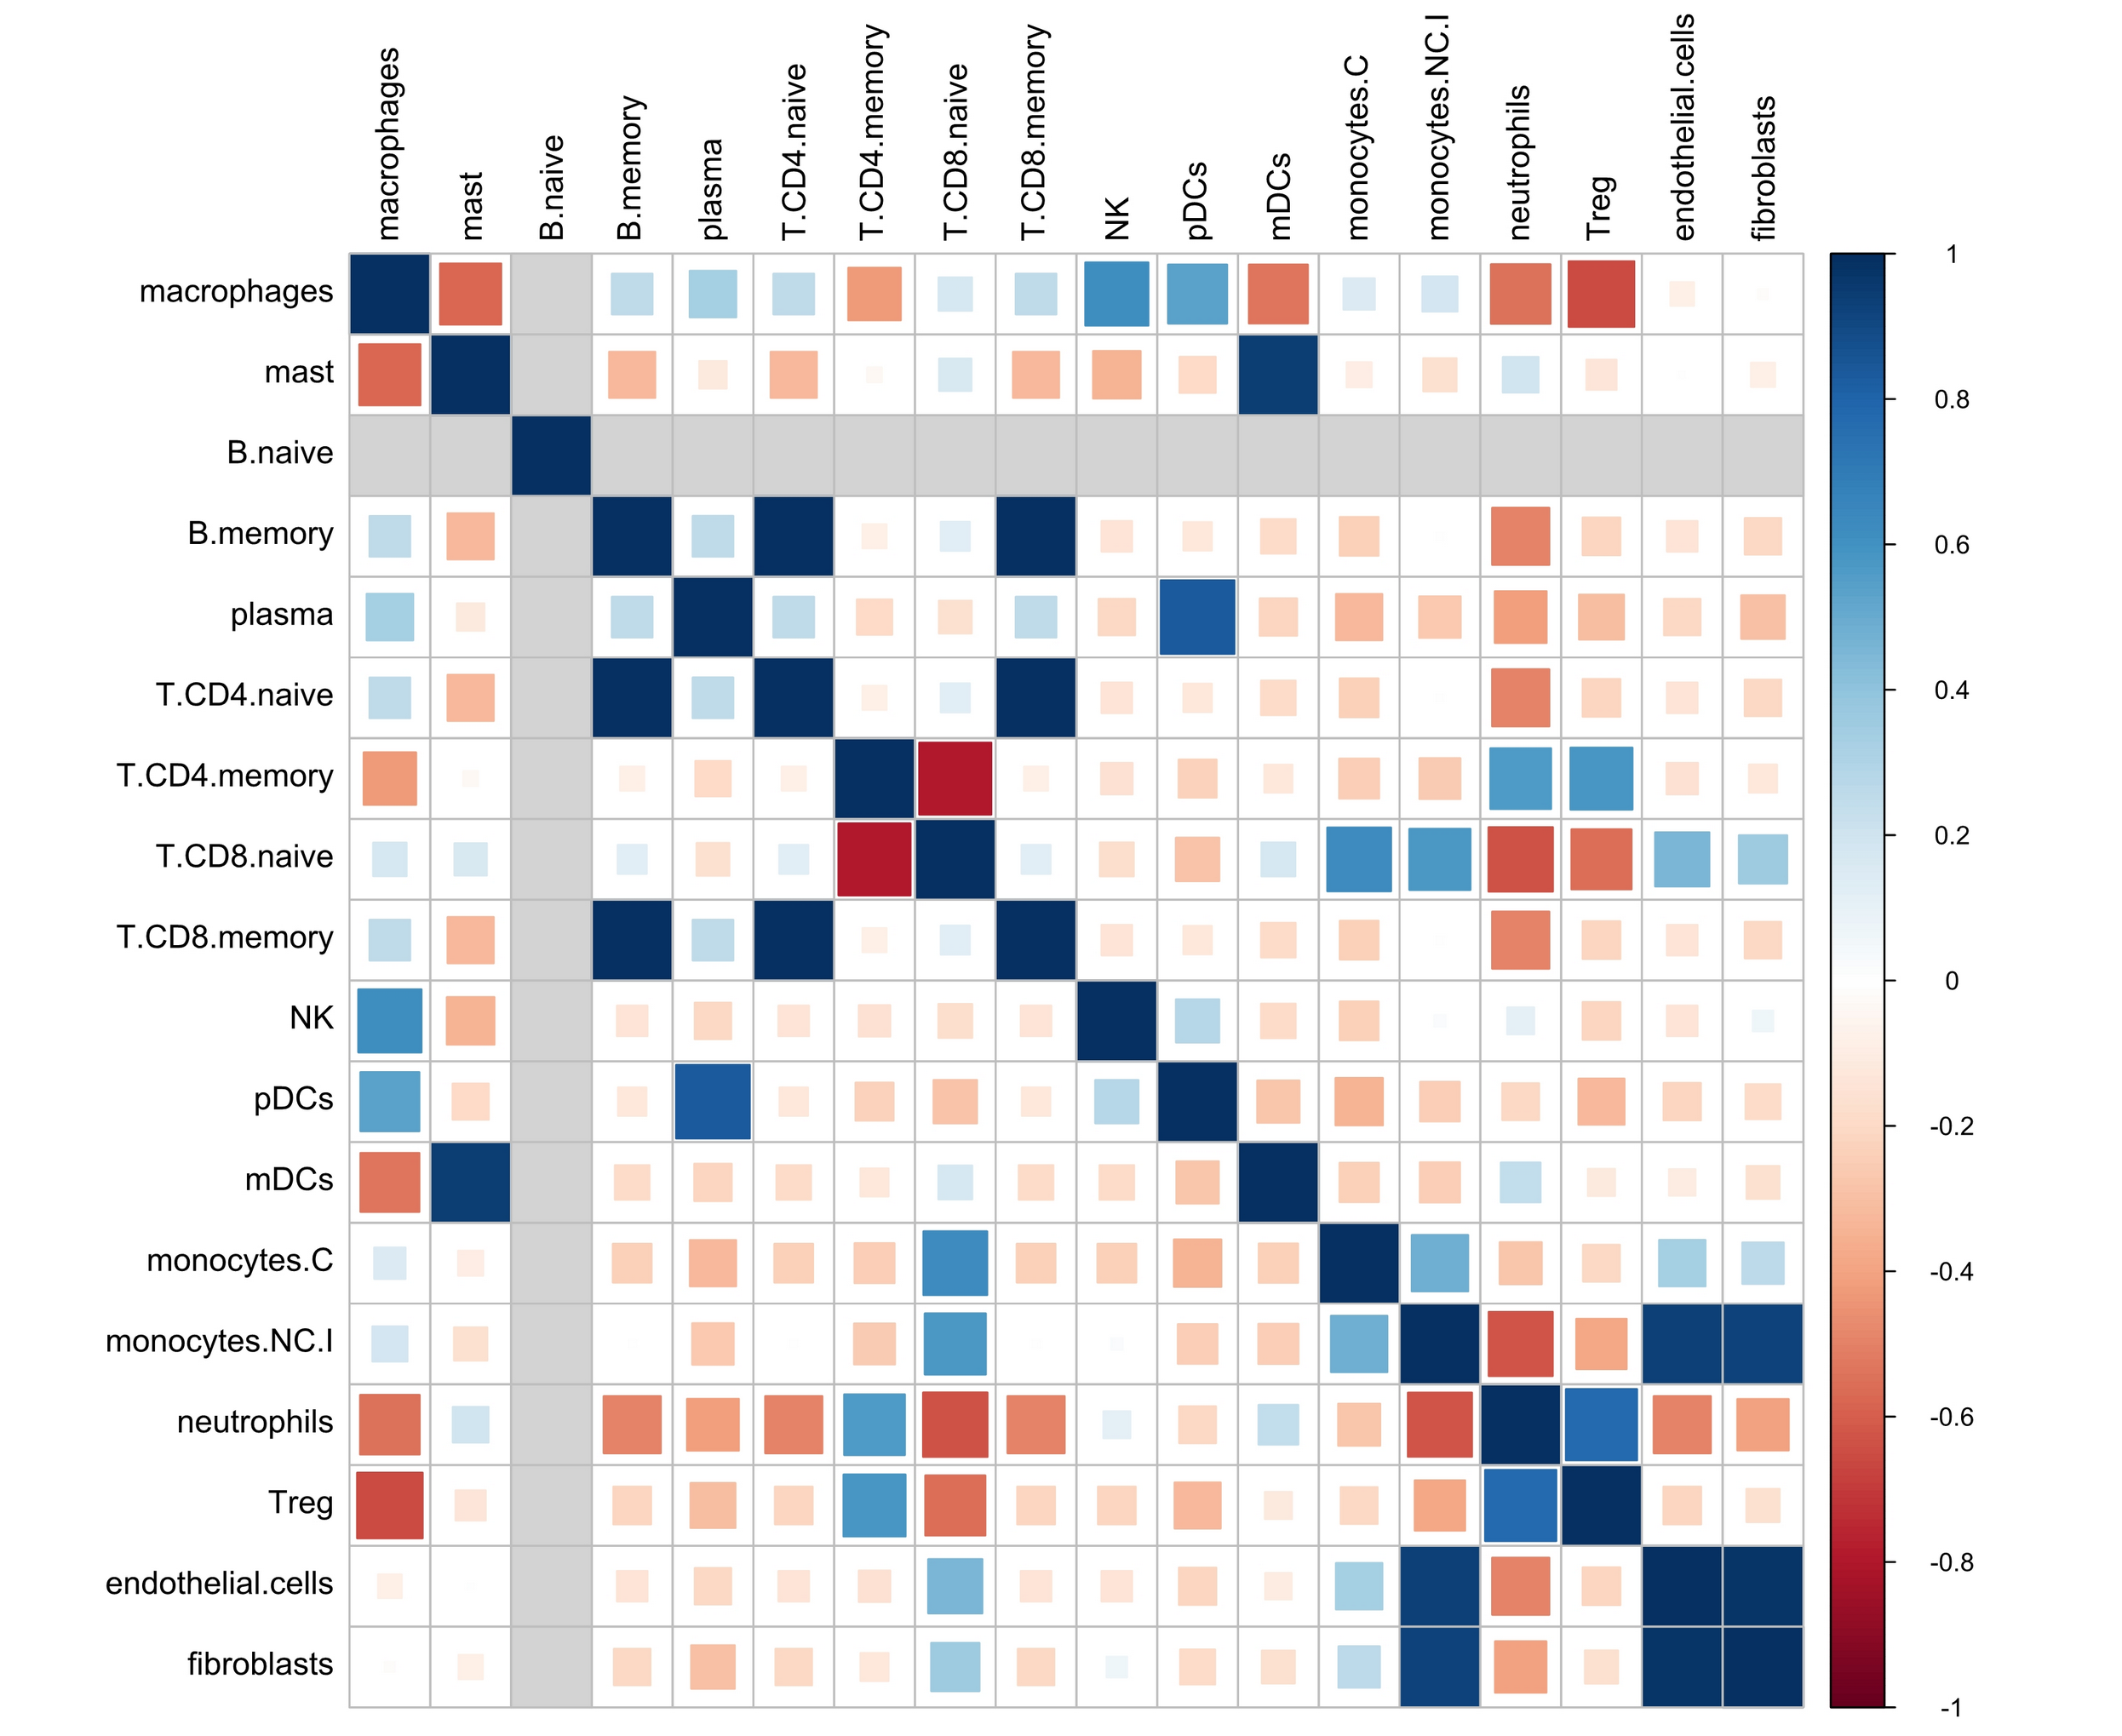


Supplementary Figure 10. Correlation matrix plot of the abundance of immune/inflammation cell subsets revealed a predominantly negative correlation in white thrombosis.

Supplementary Table 1. Cell abundance in ROI

| **Cell Type** | **ROI1** | **ROI2** | **ROI3** | **ROI4** | **ROI5** | **ROI6** | **ROI7** | **ROI8** | **ROI9** | **ROI10** | **ROI11** | **ROI12** | **ROI13** | **ROI14** | **ROI15** | **ROI16** | **ROI17** | **ROI18** | **ROI19** | **ROI20** | **ROI21** | **ROI22** | **ROI23** |
| --- | --- | --- | --- | --- | --- | --- | --- | --- | --- | --- | --- | --- | --- | --- | --- | --- | --- | --- | --- | --- | --- | --- | --- |
| macrophages | 0.044188717 | 0.097751737 | 0.175728394 | 0 | 0.151579045 | 0 | 0 | 0.059665731 | 0 | 0.14756348 | 0.325718195 | 0.146091629 | 0 | 0.032002414 | 0.1959103 | 0.245926755 | 0.270526158 | 1.167528537 | 0.178039758 | 0.150651628 | 0.090653784 | 0.363249606 | 0.038507909 |
| mast | 0.062281774 | 0.066869283 | 0.037086792 | 0.133326833 | 0.052113095 | 0.089682607 | 0.050923392 | 0.03637127 | 0.034340643 | 0.044897307 | 0.056889774 | 0.112331275 | 0.070180611 | 0.008845315 | 0.079411528 | 0.078418619 | 0 | 0.095754528 | 0 | 0.135680844 | 0.050261353 | 0.082294162 | 0.039570209 |
| B.naive | 0 | 0 | 0 | 0 | 0 | 0 | 0 | 0 | 0 | 0 | 0 | 0 | 0.434273074 | 0.088255747 | 0 | 0 | 0 | 0.106307688 | 0 | 0.926427112 | 0 | 0 | 0.472772001 |
| B.memory | 0 | 0 | 0 | 0 | 0.150084486 | 0 | 0 | 0 | 0 | 0 | 0 | 0 | 0 | 0 | 0 | 0 | 0 | 0.054106812 | 0 | 0 | 0 | 0 | 0 |
| plasma | 0 | 0.47136138 | 0 | 0.014780411 | 0.29649569 | 0 | 0 | 0 | 0 | 0 | 0 | 0.123433366 | 0 | 0 | 0.105517251 | 0 | 0.161142456 | 0.470808608 | 0 | 0.178901267 | 0.290946234 | 0.402570541 | 0 |
| T.CD4.naive | 0 | 0 | 0 | 0 | 0.069107583 | 0 | 0 | 0 | 1.460801679 | 2.310620816 | 0 | 0 | 0 | 0 | 0 | 0 | 0 | 0 | 0 | 1.661746594 | 0.189391007 | 0 | 0 |
| T.CD4.memory | 0 | 0 | 0 | 0 | 0.054077318 | 0.844264078 | 0 | 0 | 0 | 0 | 0.248065512 | 0 | 0 | 0 | 0 | 0 | 0 | 2.204008697 | 0 | 0 | 0.185696603 | 0 | 0 |
| T.CD8.naive | 1.412554647 | 0.9854662 | 1.216338303 | 1.049286427 | 2.013413427 | 0.635033224 | 1.177886582 | 0.927149244 | 0 | 0.651049293 | 0.473329826 | 1.445337954 | 0 | 1.286380964 | 0.945159689 | 0 | 0 | 1.83507126 | 2.411859118 | 0 | 2.258616989 | 2.164489605 | 0.796963151 |
| T.CD8.memory | 0 | 0 | 0 | 0 | 0.405113924 | 0 | 0 | 0 | 0 | 0.558293986 | 0 | 0 | 0 | 0 | 0.851386542 | 1.284110588 | 0.966503133 | 0 | 1.684228926 | 0.530630692 | 0.056400495 | 0.376009804 | 1.580496234 |
| NK | 0 | 0 | 0.320145838 | 0 | 0 | 0 | 0 | 0 | 0 | 0 | 0.585569871 | 0 | 0 | 0 | 0 | 0.120789943 | 0.041101056 | 0.512724529 | 0 | 0.163039496 | 0 | 0.243888905 | 0.180252624 |
| pDCs | 0 | 0.297913614 | 0.157120535 | 0 | 0.037156705 | 0 | 0 | 0 | 0 | 0 | 0 | 0 | 0 | 0 | 0 | 0.196536895 | 0 | 0.278945382 | 0 | 0 | 0.070251351 | 0.024198843 | 0 |
| mDCs | 0.004908109 | 0 | 0 | 0.065938172 | 0 | 0.007107319 | 0.0099832 | 0 | 0 | 0 | 0 | 0 | 0 | 0 | 0 | 0 | 0 | 0 | 0 | 0.000163089 | 0 | 0 | 0 |
| monocytes.C | 0.033333139 | 0 | 0 | 0 | 0 | 0 | 0.011548667 | 0.044058245 | 0.02943977 | 0 | 0 | 0.063401744 | 0.062872215 | 0 | 0.000962047 | 0 | 0.049600274 | 0.105818549 | 0 | 0 | 0.005849974 | 0 | 0.037341563 |
| monocytes.NC.I | 0.130585905 | 0 | 0.03996304 | 0 | 0.046905461 | 0 | 0 | 0.023764967 | 0.026656223 | 0 | 0 | 0.325768586 | 0 | 0 | 0.013930718 | 0 | 0.222752634 | 0 | 0.108538277 | 0 | 0.107706674 | 0 | 0 |
| neutrophils | 0 | 0.199316376 | 0.515834703 | 0.375580929 | 0 | 1.033049167 | 0.658869792 | 0.172352726 | 0.250283874 | 0.939190794 | 0.839035129 | 0.32849958 | 0.962311313 | 0.249558754 | 0.003729434 | 0.328137208 | 0.274636093 | 2.715600959 | 0.612127923 | 0.842466814 | 0.094210216 | 0.514930803 | 0.790129053 |
| Treg | 0 | 0 | 0 | 0 | 0 | 0.183636409 | 0.154354131 | 0 | 0 | 0 | 0 | 0.508347219 | 0 | 0 | 0.34582518 | 0 | 0 | 0.073190853 | 0 | 0 | 0 | 0 | 0 |
| endothelial.cells | 0.078815947 | 0 | 0 | 0 | 0 | 0 | 0 | 0 | 0.104921676 | 0 | 0 | 0 | 0 | 0 | 0 | 0 | 0.075302468 | 0.869402488 | 0 | 0.06781152 | 0.195185283 | 0.031656622 | 0.373914964 |
| fibroblasts | 0.117861478 | 0 | 0.035738713 | 0 | 0 | 0.014327599 | 0.010111143 | 0 | 0.007098842 | 0.056660856 | 0.006613313 | 0.006215683 | 0 | 0.025807441 | 0.002803886 | 0.024409662 | 0.041260878 | 0.004916935 | 0.032770674 | 0.036016184 | 0.038188367 | 0.024190323 | 0 |

Table note: The first ten cells in white thrombus in descending order of cell abundance were T.CD8.naive, neutrophils, T.CD4.memory, plasma, macrophages, mast cells, pDCs, T.CD8.memory, Treg, and NK, and in mixed thrombus were T.CD8.naive, neutrophils, T.CD4.naive, T.CD8.memory, macrophages, Treg, NK, B.naive, mast, monocytes.NC, and in red thrombus were T.CD8.naive, neutrophils, T.CD8.memory, T.CD4.memory, macrophages, T.CD4.naive, endothelial cells, B.naive, plasma, NK.
